# Supplementary material for: DNA adsorption on nanoscale zeolitic imidazolate framework-8 enabling rational design of a DNA-based nanoprobe for gene detection and regulation in living cells
Source: Royal Society of Chemistry journal article supplement (doi:10.1039/d0ra06218a), 2020-01-01
Supplement: d0ra06218a1.pdf [file d0ra06218a1.pdf]

## Supporting Information

### **DNA Adsorption on Nanoscale Zeolitic Imidazolate Framework-8 Enabling Rational Design of DNA-based Nanoprobe for Gene Detection and Regulation in Living Cells**

Shengmei Wang<sup>1, 2†</sup>, Linqi Ouyang<sup>1, 2†</sup>, Guiming Deng<sup>2</sup>, Zhenzhen Deng<sup>1</sup> and Shengfeng Wang<sup>1\*</sup>

<sup>1</sup>. Department of Pharmacy, the Third Xiangya Hospital, Central South University, Changsha, Hunan, 410013, China

<sup>2</sup>. Department of Pharmacy, the First Hospital of Hunan University of Chinese Medicine, Changsha, Hunan, 410007, China

\* Corresponding author.

Email: sunfeelwang@126.com

† These authors contributed equally to this work.



**Table S1 Oligonucleotide sequences and modifications used in this work**

| DNA names                         | Sequences and modifications (from 5' to 3')                         |
|-----------------------------------|---------------------------------------------------------------------|
| DMB sensor                        | 6-FAM-<br>TCTGGCTCCCAGCTCCGAGCCGGTTCGAATCCAGCTCCTTGGCCAGA-<br>BHQ-1 |
| Target DNA<br>( <i>Survivin</i> ) | CAAGGAGCTGGAAGGCTGGGAGCCAGA                                         |
| Mis 1                             | CAAGAAGCTGGAAGGCTGGGAGCCAGA                                         |
| Mis 3                             | CAAGAAGCTGGAAGGCTAGGCGCCAGA                                         |
| DMB-FAM                           | 6-FAM-<br>TCTGGCTCCCAGCTCCGAGCCGGTTCGAATCCAGCTCCTTGGCCAGA           |
| DMB                               | TCTGGCTCCCAGCTCCGAGCCGGTTCGAATCCAGCTCCTTGGCCAGA                     |
| DMB-Sub-FAM                       | 6-FAM-CAAGGAGCTGGA/rA/GGCTGGGAGCCAGA                                |
| A15-FAM                           | 6-FAM-AAAAAAAAAAAAAAAAA                                             |
| A15                               | AAAAAAAAAAAAAAAAA                                                   |
| T15-FAM                           | 6-FAM-TTTTTTTTTTTTTTTT                                              |
| T15                               | TTTTTTTTTTTTTTTTT                                                   |
| C15-FAM                           | 6-FAM-CCCCCCCCCCCCCCC                                               |
| C15                               | CCCCCCCCCCCCCCC                                                     |
| G15-FAM                           | 6-FAM-GGGGGGGGGGGGGGG                                               |
| G15                               | GGGGGGGGGGGGGGG                                                     |
| <i>Survivin</i> forward<br>primer | ATGGGTGCCCCGACGTTG                                                  |
| <i>Survivin</i> reverse<br>primer | AGAGGCCTCAATCCATGG                                                  |
| <i>GAPDH</i> forward<br>primer    | GAACGGGAAGCTCACTGG                                                  |
| <i>GAPDH</i> reverse<br>primer    | GCCTGCTTCACCACCTTCT                                                 |

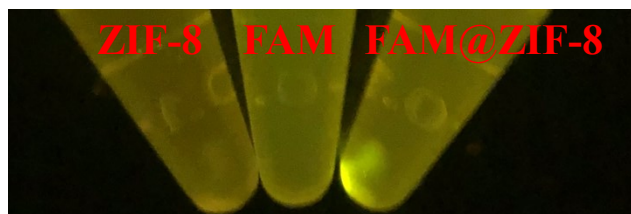

**Fig. S1** The fluorescence photograph showing adsorption of free FAM fluorophore without fluorescence quench as indicated by the strong fluorescence in precipitant. The ZIF-8 and FAM solution were also presented as controls.

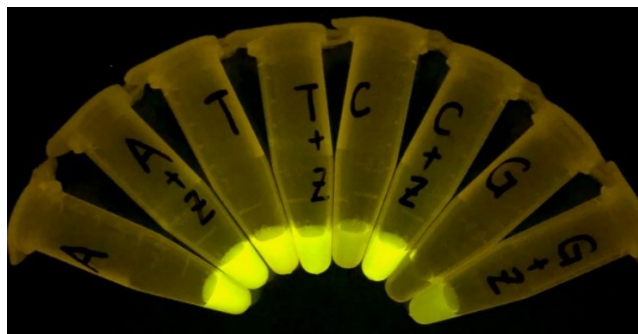

**Fig. S2** The fluorescence photograph showing FAM-labeled homo-DNAs mixed with or without ZIF-8.

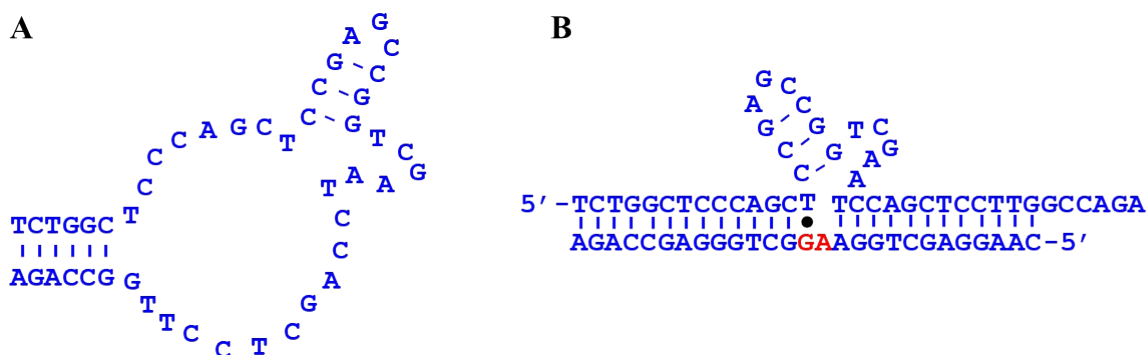

**Fig. S3** The secondary structures of (A) DMB and (B) DMB+cDNA.

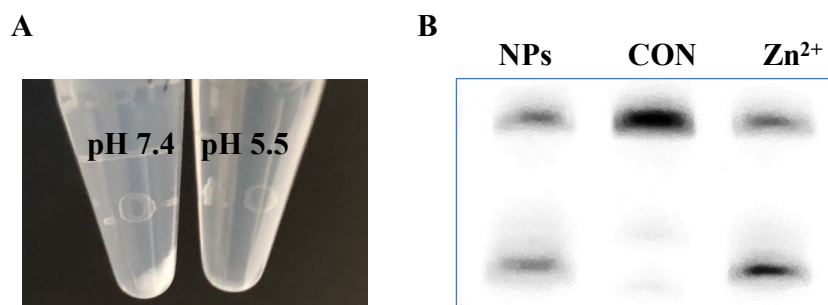

**Fig. S4** (A) The image of ZIF-8 NPs dissolving in neutral (pH 7.4) and acid conditions (pH 5.5) for 24 h. (B) Gel image indicating the cleavage activity of DMB triggered by ZIF-8 NPs (the supernatant of the ZIF-8 after pretreatment of acidic pH), CON (no Zn<sup>2+</sup>), and Zn<sup>2+</sup>.
